# Supplementary material for: Microfluidic single-cell migration chip reveals insights into the impact of extracellular matrices on cell movement
Source: Royal Society of Chemistry journal article supplement (doi:10.1039/d3lc00651d), 2023-01-01
Supplement: d3lc00651d1.pdf [file d3lc00651d1.pdf]

**Title:**

Microfluidic Single-Cell Migration Chip Reveals Insights into the Impact of Extracellular Matrices on Cell Movement

**Authors:**

Mengli Zhou<sup>a,b,c</sup>, Yushu Ma<sup>a,b</sup>, Edwin C. Rock<sup>d</sup>, Chun-Cheng Chiang<sup>a,b</sup>, Kathryn E. Luker<sup>e</sup>, Gary D. Luker<sup>e,f,g</sup>, Yu-Chih Chen<sup>a,b,d,h\*</sup>

a UPMC Hillman Cancer Center, University of Pittsburgh, 5115 Centre Ave, Pittsburgh, PA 15232, USA;

b Department of Computational and Systems Biology, University of Pittsburgh, 3420 Forbes Avenue, Pittsburgh, PA 15260, USA;

c Xiangya Hospital, Central South University, Changsha, Hunan, 410008, China;

d Department of Bioengineering, Swanson School of Engineering, University of Pittsburgh, 3700 O'Hara Street, Pittsburgh, PA 15260, USA;

e Center for Molecular Imaging, Department of Radiology, University of Michigan, 109 Zina Pitcher Place, Ann Arbor, MI 48109-2200, USA;

f Department of Microbiology and Immunology, University of Michigan, 109 Zina Pitcher Place, Ann Arbor, MI 48109-2200, USA;

g Department of Biomedical Engineering, University of Michigan, 2200 Bonisteel, Blvd. Ann Arbor, MI 48109-2099, USA

h CMU-Pitt Ph.D. Program in Computational Biology, University of Pittsburgh, 3420 Forbes Avenue, Pittsburgh, PA 15260, USA

\*Corresponding author

Yu-Chih Chen

5115 Centre Ave, Pittsburgh, PA 15232, USA

Tel: 412-623-7701; E-mail: chen25@upmc.edu.

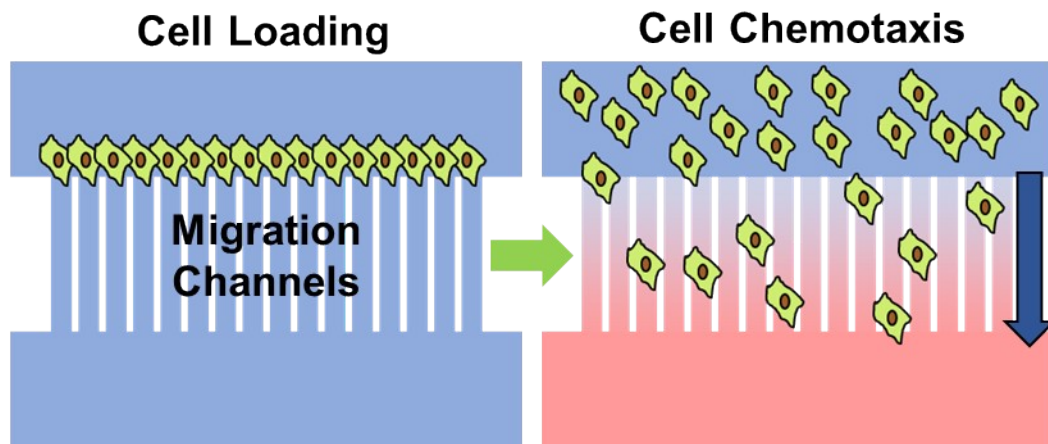

**Figure S1.** Operation of the single-cell migration device. Initially, cells are loaded into the upper wells. After cell adhesion, chemoattractant is loaded in the lower wells to induce cell migration into channels.

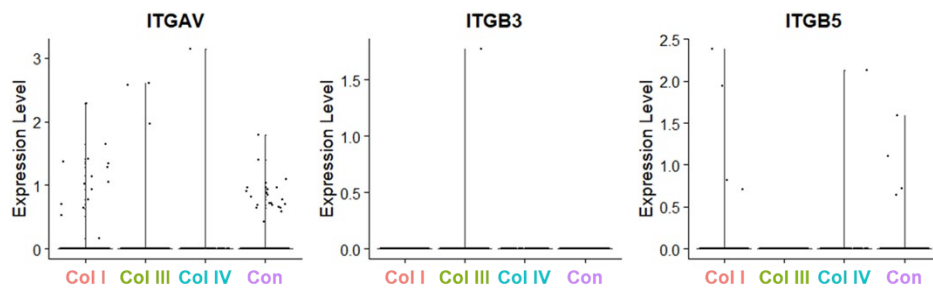

**Figure S2.** Violin plots of gene expression levels of ITGAV, ITGB3, and ITGB5 with a logarithmic scale. The Y-axis represents gene expression. Each dot represents one cell.

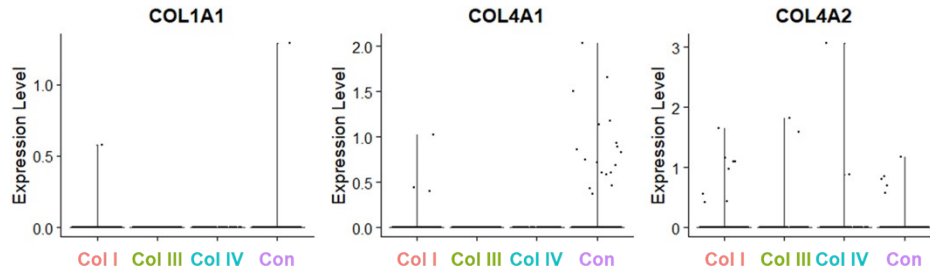

**Figure S3.** Violin plots of gene expression levels of COL1A1, COL4A1, and COL4A2 with a logarithmic scale. The Y-axis represents gene expression. Each dot represents one cell.

**Table S1. The list of compounds.**

| Source      | Item #   | Compounds Name               | Target                      |
|-------------|----------|------------------------------|-----------------------------|
| Cayman      | 11421    | Actinomycin D                | Chemo                       |
| Cayman      | 10008822 | Bortezomib (PS-341)          | Proteasome                  |
| Cayman      | 22266    | Digoxin                      | HIF                         |
| Cayman      | 11637    | Docetaxel                    | Chemo                       |
| Cayman      | 15007    | Doxorubicin                  | Chemo                       |
| Cayman      | 11596    | Enzalutamide                 | AR Inhibitor                |
| Cayman      | 10011269 | Fulvestrant                  | HR Inhibitor                |
| Cayman      | 15312    | Galunisertib                 | TGFB                        |
| Cayman      | 9003096  | Gemcitabine                  | Chemo                       |
| Cayman      | 14180    | Irinotecan                   | Chemo                       |
| Cayman      | 13986    | Pirfenidone                  | TGFB                        |
| Cayman      | 27190    | Tamoxifen                    | HR Inhibitor                |
| Cayman      | 22964    | Valrubicin                   | Chemo                       |
| Cayman      | 10009929 | Vorinostat (SAHA)            | HDAC                        |
| Cayman      | 10483    | Erlotinib                    | EGFR                        |
| Cayman      | 15008    | Exemestane                   | ER                          |
| Cayman      | 23732    | Ixabepilone                  | Chemo                       |
| Cayman      | 10461    | Paclitaxel                   | Chemo                       |
| Cayman      | 17130    | Romidepsin                   | HDAC                        |
| Cayman      | 21262    | Vinorelbine (tartrate)       | Chemo                       |
| Cayman      | 22262    | Cabazitaxel                  | Chemo                       |
| Cayman      | 12097    | Pazopanib                    | EGFR                        |
| Cayman      | 15632    | SN-38                        | Topoisomerase I             |
| Cayman      | 11492    | Afatinib                     | EGFR                        |
| Cayman      | 13119    | Cisplatin                    | Chemo                       |
| Cayman      | 14416    | 5-Fluorouracil               | Chemo                       |
| Selleckchem | S1133    | Alisertib (MLN8237)          | Aurora                      |
| Selleckchem | S1048    | Tozasertib (VX-680, MK-0457) | Aurora                      |
| Selleckchem | S3479    | R243                         | CCR                         |
| Selleckchem | S8512    | Cenicriviroc(TAK-652)        | CCR                         |
| Selleckchem | S9634    | Phenoxodiol (Haginin E)      | cFlip                       |
| Selleckchem | S1003    | Linifanib(ABT-869)           | CSF1R                       |
| Selleckchem | S7818    | Pexidartinib(PLX3397)        | CSF1R                       |
| Selleckchem | S8640    | Reparixin (Repertaxin)       | CXCR1                       |
| Selleckchem | S2912    | WZ811                        | CXCR4                       |
| Selleckchem | S8030    | Plerixafor(AMD3100)          | CXCR4                       |
| Selleckchem | S2672    | PF-00562271Besylate          | Focal Adhesion Kinase (FAK) |
| Selleckchem | S7654    | Defactinib(VS-6063)          | Focal Adhesion Kinase (FAK) |
| Selleckchem | S7653    | PND-1186(VS-4718)            | Focal Adhesion Kinase (FAK) |

|                |           |                                  |              |
|----------------|-----------|----------------------------------|--------------|
| Selleckchem    | S6620     | Danirixin(GSK1325756)            | IL8          |
| Selleckchem    | S1189     | Aprepitant(MK-0869)              | IL8          |
| Selleckchem    | S7077     | Cilengitide                      | Integrin     |
| Selleckchem    | S7540     | SB273005                         | Integrin     |
| Selleckchem    | S8454     | ATN-161(Ac-PHSCN-NH2)            | Integrin     |
| Selleckchem    | S2885     | A-205804                         | Integrin     |
| Selleckchem    | S1452     | Ispinesib (SB-715992)            | Kinesin      |
| Selleckchem    | S2182     | SB743921 HCl                     | Kinesin      |
| Selleckchem    | S7783     | CombretastatinA4                 | microtubule  |
| Selleckchem    | S1364     | Patupilone(EpothiloneB)          | microtubule  |
| Selleckchem    | S1176     | Plinabulin(NPI-2358)             | microtubule  |
| Selleckchem    | S2195     | Lexibulin(CYT997)                | microtubule  |
| Selleckchem    | S7162     | Mdivi-1                          | Mitochondria |
| Selleckchem    | S3375     | Mitochondrial Fusion Promoter M1 | Mitochondria |
| Selleckchem    | S1247     | Leflunomide                      | Mitochondria |
| Selleckchem    | S6494     | CCCP                             | Mitochondria |
| Selleckchem    | S7922     | Tiplaxtinin                      | Mitochondria |
| Selleckchem    | S8047     | Dynasore                         | Mitochondria |
| Selleckchem    | S8388     | ML-7 HCl                         | myosin       |
| Selleckchem    | S1573     | Fasudil(HA-1077) HCl             | myosin       |
| Selleckchem    | S8078     | Bardoxolone Methyl               | NFKB         |
| Selleckchem    | S2824     | TPCA-1                           | NFKB         |
| Selleckchem    | S4902     | QNZ                              | NFKB         |
| Selleckchem    | S3603     | Betulinic acid                   | NFKB         |
| Selleckchem    | S7271     | FRAX597                          | PAK          |
| Selleckchem    | S7094     | PF-3758309                       | PAK          |
| Selleckchem    | S7482     | EHT1864-2HCl                     | Rac CDC42    |
| Selleckchem    | S8749     | MBQ-167                          | Rac CDC42    |
| Selleckchem    | S8988     | Rhosin hydrochloride             | Rho          |
| Selleckchem    | S6636     | Azaindole 1 (TC-S 7001)          | ROCK         |
| Selleckchem    | S1474     | GSK429286A                       | ROCK         |
| Selleckchem    | S1006     | Saracatinib(AZD0530)             | Src          |
| Selleckchem    | S2700     | KX2-391(Tirbanibulin)            | Src          |
| Selleckchem    | S1021     | Dasatinib(BMS-354825)            | Src          |
| Selleckchem    | S2788     | Capmatinib (INCB28060)           | WNT          |
| Selleckchem    | S7143     | LGK-974                          | WNT          |
| Selleckchem    | S7885     | SBI-0206965                      | Autophagy    |
| Selleckchem    | S2289     | Daidzin                          | ALDH         |
| Selleckchem    | S2853     | Carfilzomib (PR-171)             | Proteasome   |
| Selleckchem    | S8148     | PD0166285                        | Wee1         |
| Selleckchem    | S1525     | Adavosertib (MK-1775)            | Wee1         |
| Cayman         | 19200     | Thiostrepton                     | FOXM1        |
| Medchemexpress | HY-112721 | FDI-6                            | FOXM1        |

|        |          |                   |                 |
|--------|----------|-------------------|-----------------|
| Cayman | 20305    | Terfenadine       | Anti-Histoamine |
| Cayman | 10008005 | OSU-03012 (AR-12) | PDK-1           |
| Cayman | 22142    | NVP-BGT226        | PI3K/mTOR       |
| Cayman | 19420    | CC-115            | mTor/DNA-PK     |
| Cayman | 18464    | XL184             | AXL             |
| Cayman | 21523    | R428              | AXL             |

**Table S2. The effects of compounds on cell viability.**

| <b>Compounds Name</b>        | <b># of MDA-MB231 Cells</b> | <b>Normalized to Control</b> |
|------------------------------|-----------------------------|------------------------------|
| Control                      | 5970                        | 1.000                        |
| Actinomycin D                | 424                         | 0.071                        |
| Bortezomib (PS-341)          | 198                         | 0.033                        |
| Digoxin                      | 620                         | 0.104                        |
| Docetaxel                    | 428                         | 0.072                        |
| Doxorubicin                  | 614                         | 0.103                        |
| Fulvestrant                  | 2966                        | 0.497                        |
| Galunisertib                 | 3059                        | 0.512                        |
| Gemcitabine                  | 766                         | 0.128                        |
| Pirfenidone                  | 3270                        | 0.548                        |
| Tamoxifen                    | 3702                        | 0.620                        |
| Valrubicin                   | 1266                        | 0.212                        |
| Vorinostat (SAHA)            | 730                         | 0.122                        |
| Erlotinib                    | 5971                        | 1.000                        |
| Exemestane                   | 5724                        | 0.959                        |
| Ixabepilone                  | 547                         | 0.092                        |
| Paclitaxel                   | 980                         | 0.164                        |
| Romidepsin                   | 141                         | 0.024                        |
| Vinorelbine (tartrate)       | 206                         | 0.035                        |
| Cabazitaxel                  | 565                         | 0.095                        |
| Pazopanib                    | 4396                        | 0.736                        |
| SN-38                        | 726                         | 0.122                        |
| Afatinib                     | 2039                        | 0.342                        |
| Cisplatin                    | 2796                        | 0.468                        |
| 5-Fluorouracil               | 6094                        | 1.021                        |
| Alisertib (MLN8237)          | 602                         | 0.101                        |
| Tozasertib (VX-680, MK-0457) | 603                         | 0.101                        |
| R243                         | 2186                        | 0.366                        |
| Cenicriviroc(TAK-652)        | 1523                        | 0.255                        |
| Phenoxodiol (Haginin E)      | 3681                        | 0.617                        |
| Linifanib(ABT-869)           | 1680                        | 0.281                        |
| Pexidartinib(PLX3397)        | 1675                        | 0.281                        |
| Reparixin (Repertaxin)       | 1898                        | 0.318                        |
| WZ811                        | 1304                        | 0.218                        |
| Plerixafor(AMD3100)          | 1543                        | 0.258                        |
| PF-00562271Besylate          | 1992                        | 0.334                        |
| Defactinib(VS-6063)          | 3208                        | 0.537                        |
| PND-1186(VS-4718)            | 4230                        | 0.709                        |
| Danirixin(GSK1325756)        | 2726                        | 0.457                        |
| Aprepitant(MK-0869)          | 2761                        | 0.462                        |



|                                  |      |       |
|----------------------------------|------|-------|
| Cilengitide                      | 3339 | 0.559 |
| SB273005                         | 1483 | 0.248 |
| ATN-161(Ac-PHSCN-NH2)            | 1117 | 0.187 |
| A-205804                         | 3059 | 0.512 |
| Ispinesib (SB-715992)            | 412  | 0.069 |
| SB743921 HCl                     | 502  | 0.084 |
| CombretastatinA4                 | 402  | 0.067 |
| Patupilone(EpothiloneB)          | 890  | 0.149 |
| Plinabulin(NPI-2358)             | 2141 | 0.359 |
| Lexibulin(CYT997)                | 457  | 0.077 |
| Mdivi-1                          | 471  | 0.079 |
| Mitochondrial Fusion Promoter M1 | 1047 | 0.175 |
| Leflunomide                      | 248  | 0.042 |
| CCCP                             | 2736 | 0.458 |
| Tiplaxtinin                      | 1688 | 0.283 |
| Dynasore                         | 2819 | 0.472 |
| ML-7 HCl                         | 3536 | 0.592 |
| Fasudil(HA-1077) HCl             | 2499 | 0.419 |
| Bardoxolone Methyl               | 874  | 0.146 |
| TPCA-1                           | 3803 | 0.637 |
| QNZ                              | 3678 | 0.616 |
| Betulinic acid                   | 3973 | 0.665 |
| FRAX597                          | 2959 | 0.496 |
| PF-3758309                       | 479  | 0.080 |
| EHT1864-2HCl                     | 387  | 0.065 |
| MBQ-167                          | 1662 | 0.278 |
| Rhosin hydrochloride             | 2495 | 0.418 |
| Azaindole 1 (TC-S 7001)          | 2275 | 0.381 |
| GSK429286A                       | 2028 | 0.340 |
| Saracatinib(AZD0530)             | 3510 | 0.588 |
| KX2-391(Tirbanibulin)            | 449  | 0.075 |
| Dasatinib(BMS-354825)            | 1707 | 0.286 |
| Capmatinib (INCB28060)           | 3642 | 0.610 |
| LGK-974                          | 3392 | 0.568 |
| SBI-0206965                      | 5474 | 0.917 |
| Daidzin                          | 4566 | 0.765 |
| Carfilzomib (PR-171)             | 114  | 0.019 |
| PD0166285                        | 304  | 0.051 |
| Adavosertib (MK-1775)            | 340  | 0.057 |
| Thiostrepton                     | 512  | 0.086 |
| FDI-6                            | 190  | 0.032 |
